# Supplementary material for: High levels of SARS-CoV-2–specific T cells with restricted functionality in severe courses of COVID-19
Source: PubMed Central journal article supplement (PMC7605520; doi:10.1172/jci.insight.142167), 2020-10-15
Supplement: jciinsight-5-142167-s039.pdf [file jciinsight-5-142167-s039.pdf]

## Supplementary Information

### High levels of SARS-CoV-2 specific T-cells with restricted functionality in severe course of COVID-19

David Schub<sup>1</sup>, Verena Klemis<sup>1</sup>, Sophie Schneitler<sup>2</sup>, Janine Mihm<sup>3</sup>, Philipp M. Lepper<sup>4</sup>, Heinrike Wilkens<sup>4</sup>, Robert Bals<sup>4</sup>, Hermann Eichler<sup>5</sup>, Barbara C. Gärtner<sup>2</sup>, Sören L. Becker<sup>2</sup>, Urban Sester<sup>3</sup>, Martina Sester<sup>1,\*</sup>, and Tina Schmidt<sup>1</sup>

<sup>1</sup>Department of Transplant and Infection Immunology, <sup>2</sup>Institute of Medical Microbiology and Hygiene, <sup>3</sup>Department of Internal Medicine IV, <sup>4</sup>Department of Internal Medicine V, <sup>5</sup>Institute of Clinical Hemostaseology and Transfusion Medicine, Saarland University, 66421 Homburg, Germany

\*Correspondence: Martina Sester, PhD, Saarland University, Department of Transplant and Infection Immunology, Institutes of Infection Medicine, building 47, Kirrberger Straße, D-66421 Homburg, Germany; email: [martina.sester@uks.eu](mailto:martina.sester@uks.eu)

## Supplementary figures

Figure S1

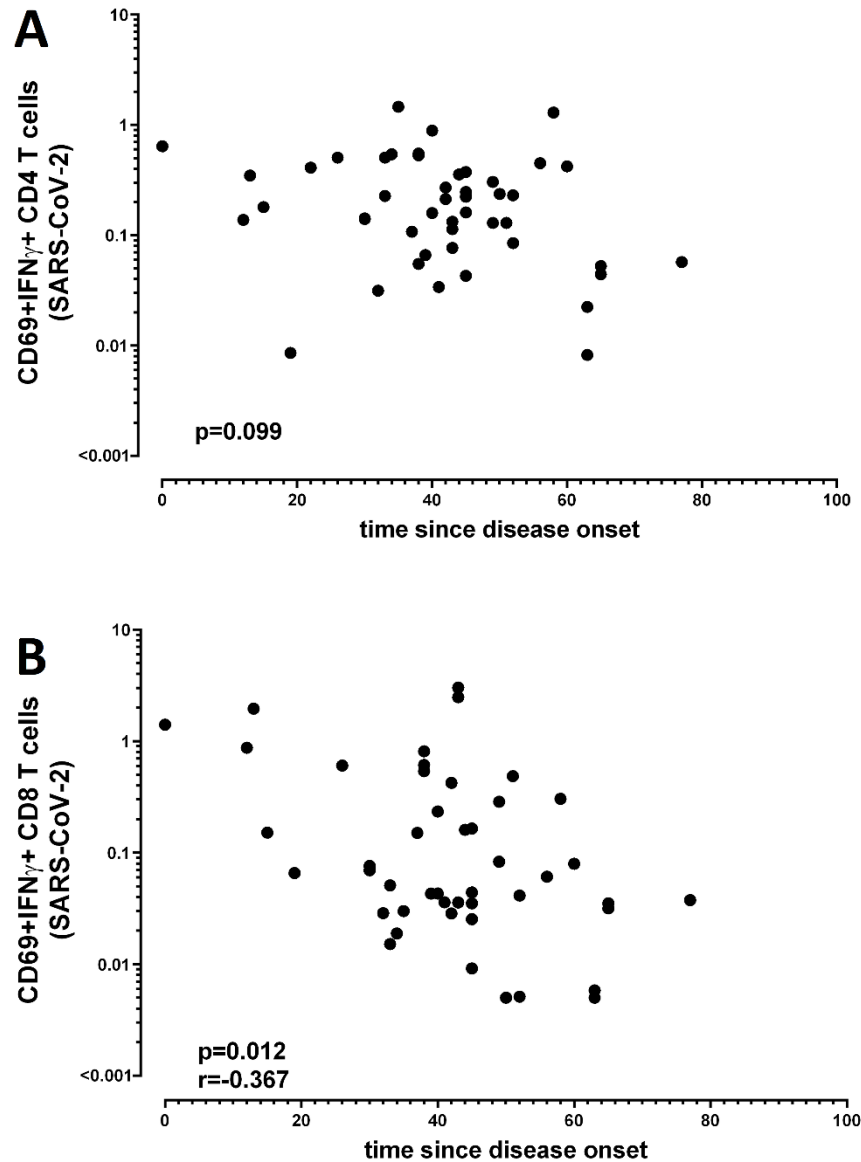

**Figure S1: Levels of SARS-CoV-2 specific CD8 T cells inversely correlate with time since onset of disease.** Total percentages of SARS-CoV-2 specific **(A)** CD4 and **(B)** CD8 T cells, determined by the sum of percentages towards the individual peptide pools for each patient, were correlated with time since onset of disease. Correlation was performed according to Spearman,  $p < 0.05$  was considered significant. IFN, interferon.

**Figure S2**

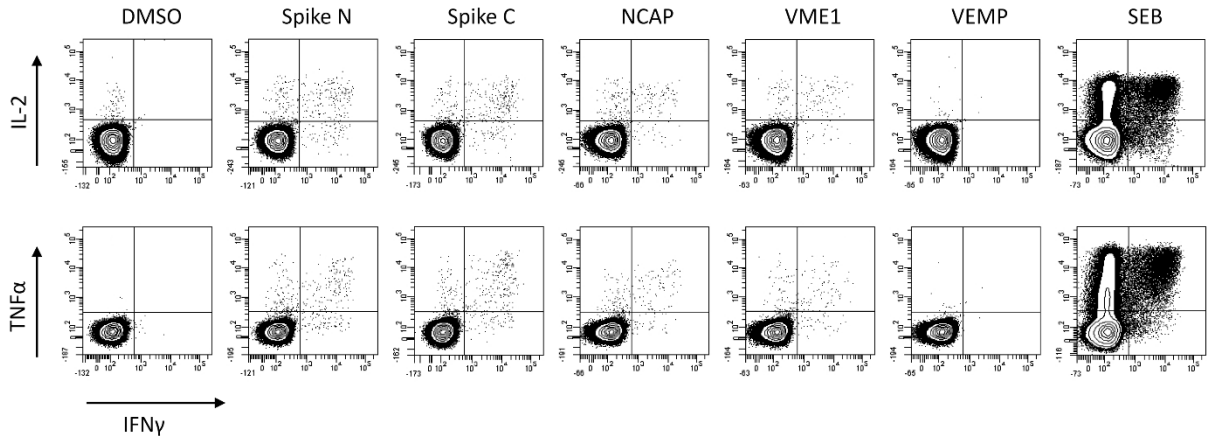

**Figure S2: Cytokine expression of CD4 T cells after antigen-specific stimulation.** Representative contour plots of CD4 T cells showing expression of the cytokines IL-2, TNF $\alpha$  and IFN $\gamma$  after antigen-specific stimulation of a whole blood sample of a patient with severe COVID-19. IFN, interferon; IL, interleukin; TNF, tumor necrosis factor.

Figure S3

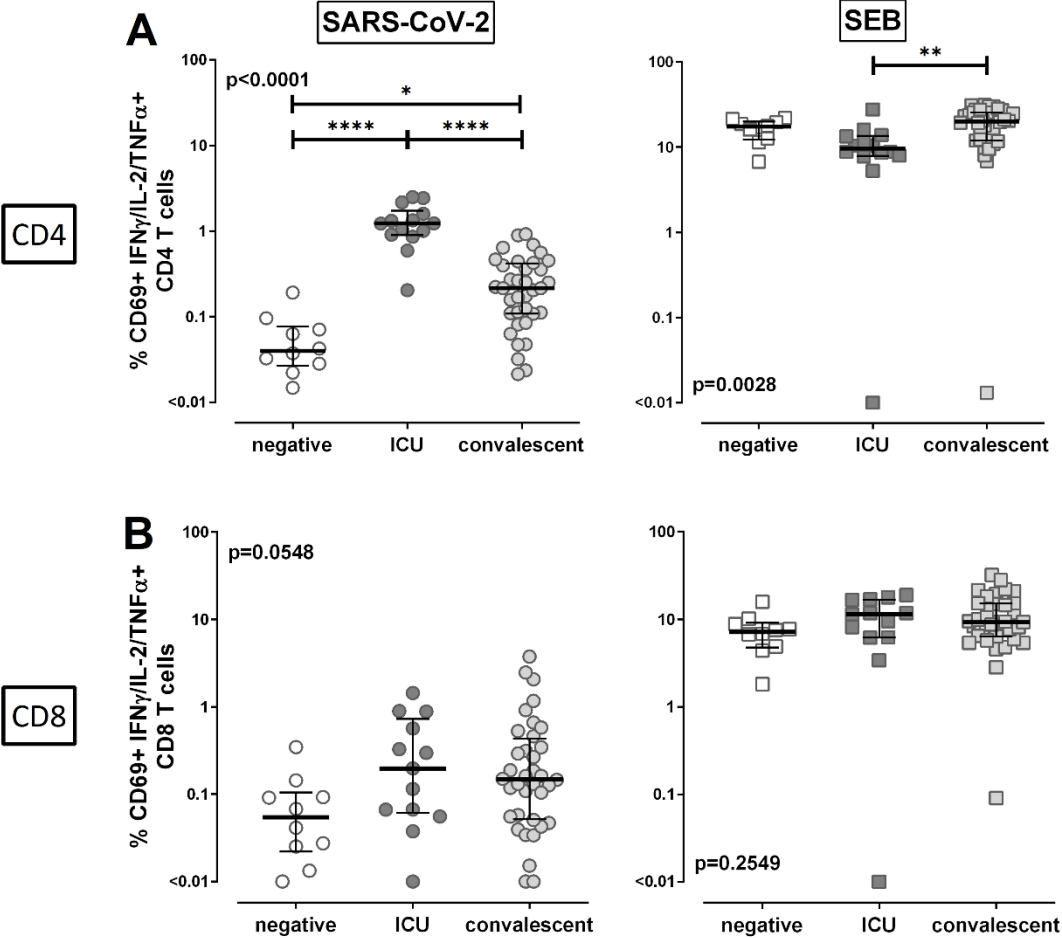

**Figure S3: Patients with severe COVID-19 show increased levels of cytokine-positive SARS-CoV-2 specific CD4 T cells.** Total percentages of SARS-CoV-2 specific and SEB-reactive (A) CD4 T cells and (B) CD8 T cells producing any of the three cytokines IFN $\gamma$ , TNF $\alpha$  and IL-2 alone or in combination as determined by Boolean gating (gating strategy in figure S6, and schematic display in figure S8). The percentage of SARS-CoV-2 specific T-cells was determined as the sum of reactive cells towards the individual peptide pools for each individual. Results were compared between SARS-CoV-2 negative individuals (negative, n=10), patients with severe COVID-19 (ICU, n=14) and convalescent patients (n=36). Bars represent medians with interquartile ranges. Differences between the groups were calculated using Kruskal-Wallis test

and Dunn's post test. \* $P < 0.05$ , \*\* $P < 0.01$ , \*\*\*\* $P < 0.0001$ . IFN, interferon; IL, interleukin; TNF, tumor necrosis factor.

Figure S4

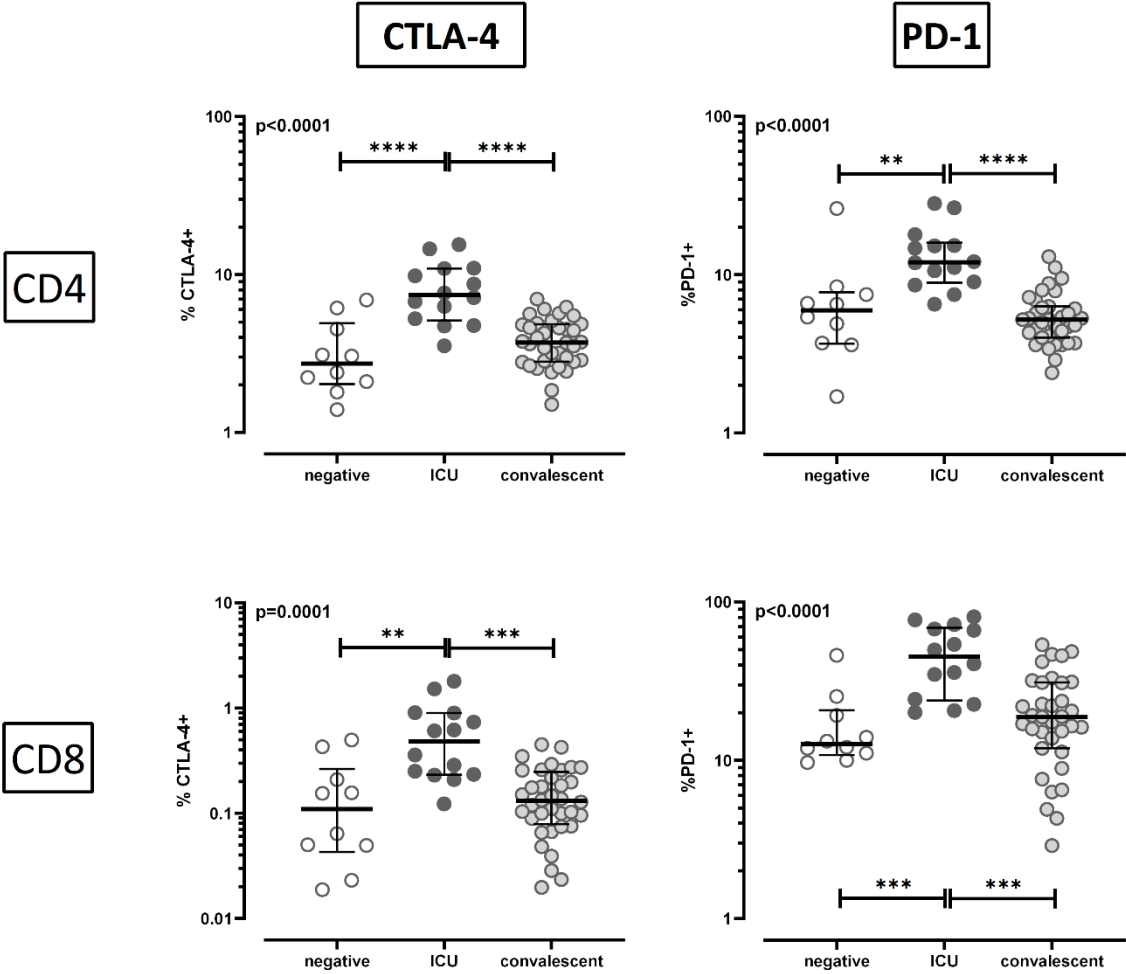

**Figure S4: Altered percentage of CTLA-4 and PD-1 expressing CD4 and CD8 T cells in patients with severe COVID-19.** Percentages of unstimulated total CD4 and CD8 T cells expressing cytotoxic T-lymphocyte antigen 4 (CTLA-4) or programmed cell death 1 (PD-1) were compared between SARS-CoV-2 negative individuals (negative, n=10), patients with severe COVID-19 (ICU, n=14) and convalescent patients (n=36). Bars represent medians with interquartile ranges. Differences between the groups were calculated using Kruskal-Wallis test and Dunn’s post test. \*P<0.05, \*\*P<0.01, \*\*\*P<0.001, \*\*\*\*P<0.0001.

**Figure S5**

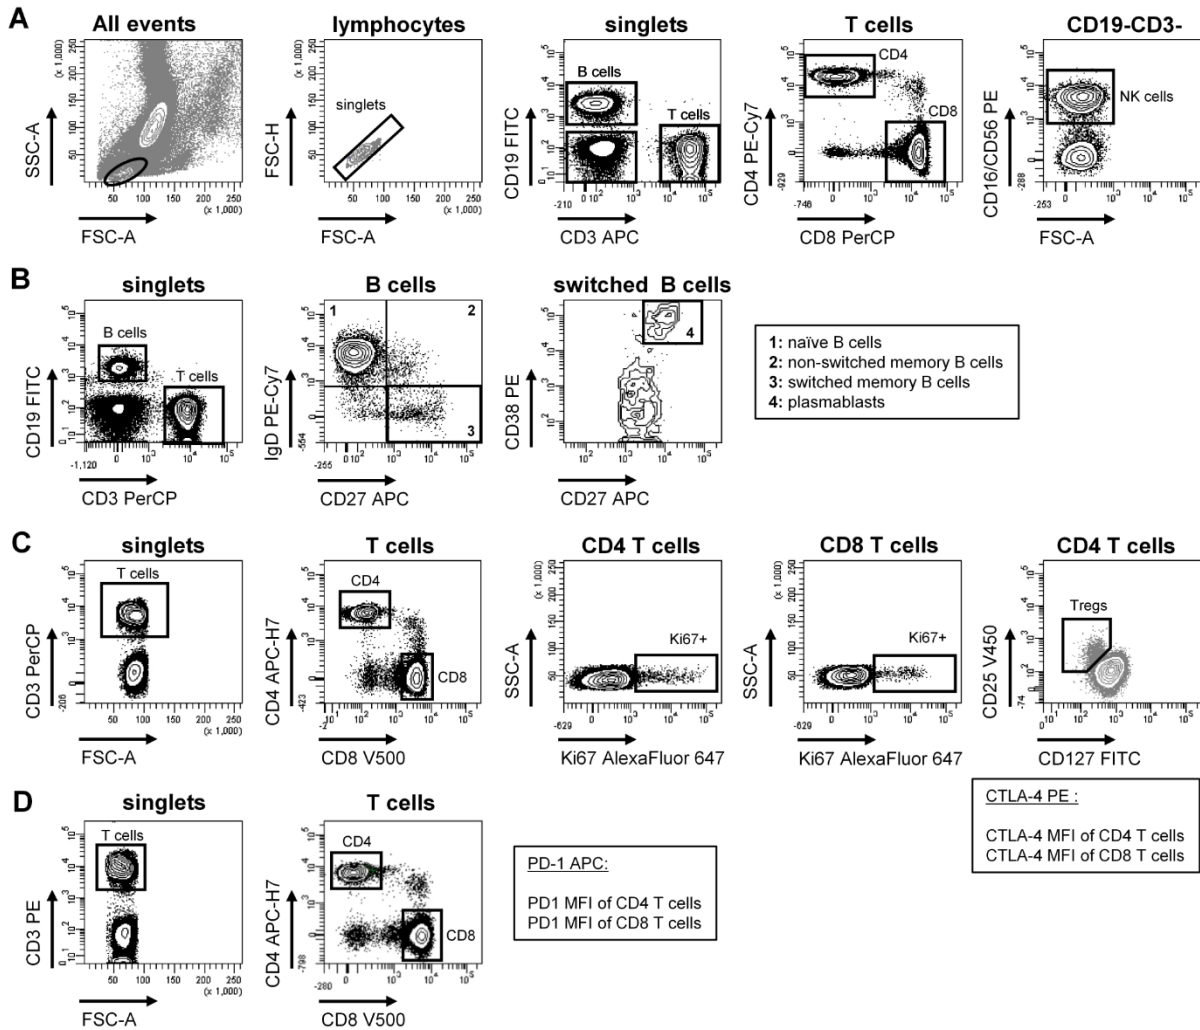

**Figure S5: Gating strategies for quantitation of lymphocyte populations. (A)** To quantify lymphocyte subpopulations, lymphocytes were gated within all events according to SSC-A and FSC-A. Exclusion of doublets was performed using high and area signal of FSC. Among single lymphocytes, B cells and T cells were identified according to expression of CD19 and CD3. T cells were further subdivided into helper T cells (CD4) and cytotoxic T cells (CD8). NK cells were determined by CD16 and/or CD56 expressing cells among single lymphocytes neither expressing CD19 nor CD3. **(B)** Among single lymphocytes, B cells were identified as CD19+CD3- and T cells were gated according to expression of CD19 and CD3. According to IgD- and CD27- expression, B cells were subdivided in naïve (IgD+CD27-), non-switched memory (IgD+CD27+)

or switched memory B cells (IgD-CD27+). Plasmablasts were identified among switched memory B cells by additional staining of CD38. As plasmablasts may also be extended in size and granularity compared with non-plasmablast, lymphocyte gates (FSC and SSC) were enlarged for quantitation of these cells. **(C)** CD3+ T cells were identified among single lymphocytes and further subdivided in CD4 and CD8 T cells. Both subpopulations were analyzed towards expression of Ki67 (percentage of positive cells) and CTLA-4 (MFI of CD4 or CD8 T cells). Regulatory T cells (Tregs) were identified among CD4 T cells by low CD127 and high CD25 expression. **(D)** CD4 and CD8 T cells were identified among total T cells (CD3) and analyzed towards expression of PD-1 (PD1 MFI). CTLA-4, cytotoxic T lymphocyte antigen 4; FSC, forward scatter; PD-1, programmed cell death 1; SSC, side scatter.



**Figure S6**

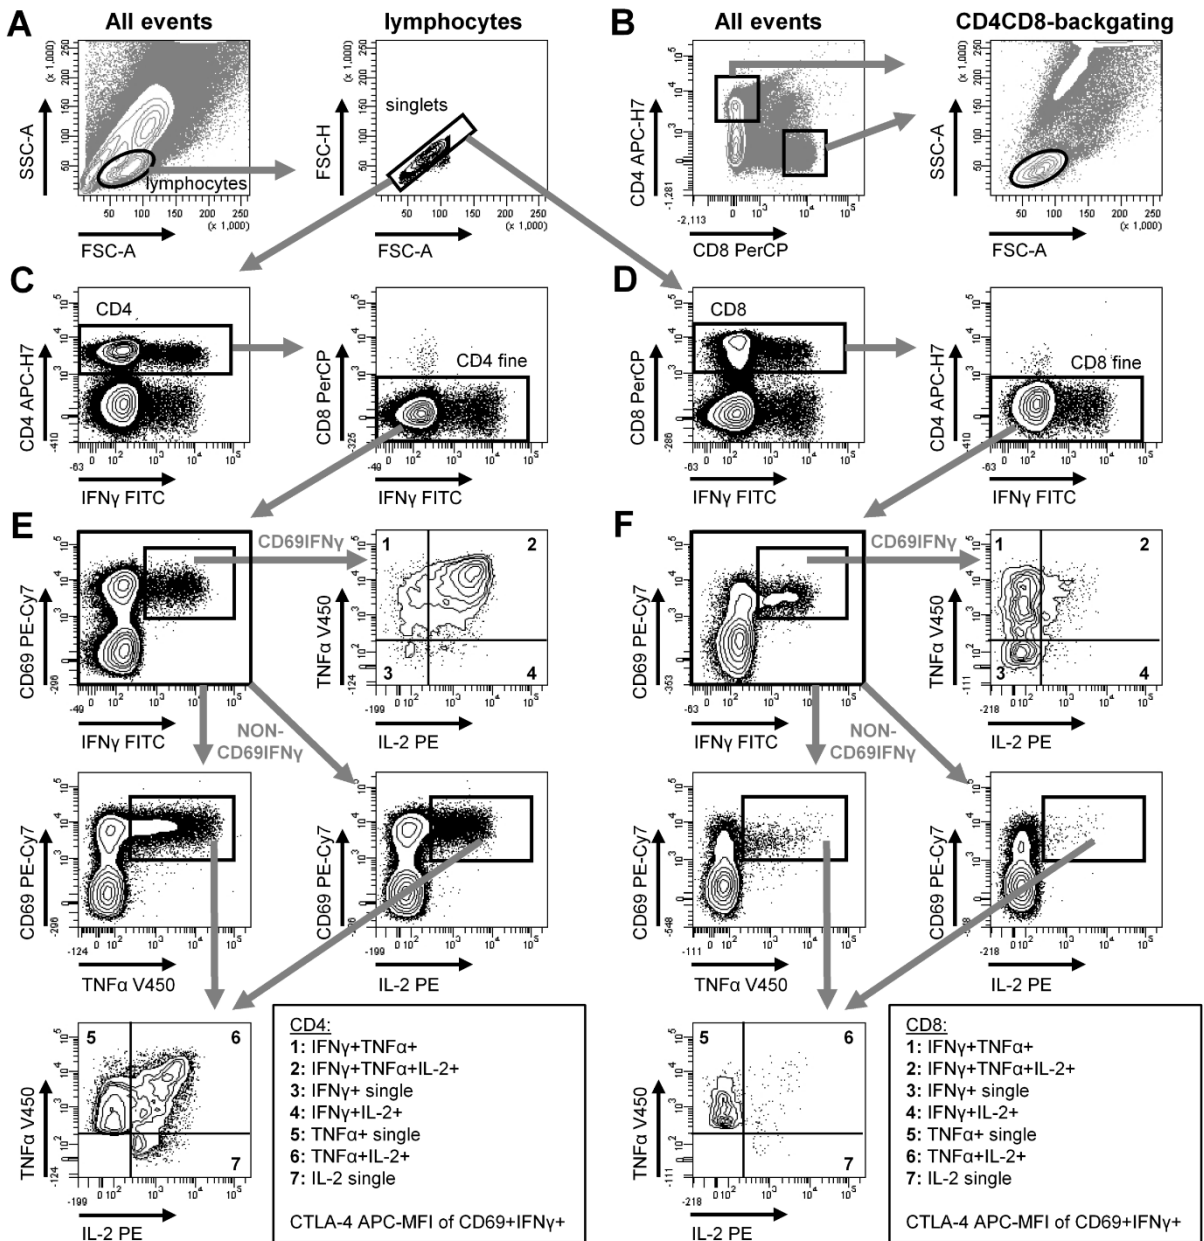

**Figure S6: Gating strategy for analysis of cytokine and CTLA-4 expression of antigen-specific**

**T cells. (A)** Lymphocytes were gated among total events according to size (FSC) and granularity (SSC) followed by exclusion of doublets using high and area signal of FSC. **(B)** To ensure accurate gating of lymphocytes, CD4/CD8 backgating was used which allows for an highlighted visualization of this population. **(C)** Among single lymphocytes, CD4 T cells (fine) were identified by exclusion of CD4-negative and CD8-positive cells. **(D)** Similarly, CD8 T cells (fine)

were identified among single lymphocytes by exclusion of CD8-negative and CD4-positive cells. To determine the percentage of antigen-specific cells, CD69+IFN $\gamma$ + T cells were identified among CD4 **(E)** and CD8 T cells **(F)**. CD69+IFN $\gamma$ + CD4 or CD8 T cells were subdivided according to expression of TNF $\alpha$  and IL-2. Among CD4 or CD8 T cells not coexpressing CD69 and IFN $\gamma$ , „AND/OR-gating“ of CD69+TNF $\alpha$ + and CD69+IL2+ CD4 or CD8 T cells allowed for identification of cells with single or combined expression of TNF $\alpha$  and IL-2. In addition expression of CTLA-4 (MFI) of CD69+IFN $\gamma$ + CD4 and CD8 T cells was analyzed. IFN, interferon; IL, interleukin; TNF, tumor necrosis factor.

Figure S7

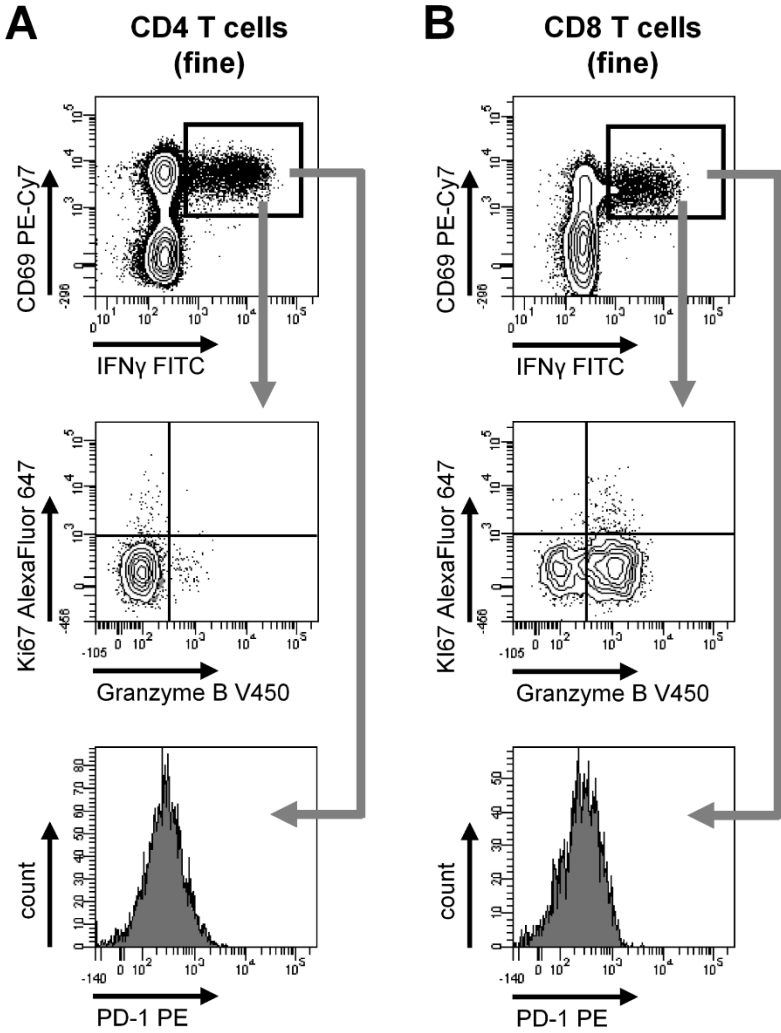

**Figure S7: Gating strategy for analysis of Ki67-, Granzyme B- and PD-1-expression of antigen-specific T cells.** Among CD4 (A) and CD8 T cells (B) (fine gating s. supplementary figure S2), antigen-specific cells were identified by co-expression of CD69 and IFN $\gamma$ . These cells were analyzed towards their expression of Ki67 and/or Granzyme B (percentage of positive cells) as well as expression of PD-1 (MFI). IFN, interferon; PD-1, programmed cell death 1.

Figure S8

**Staining of CD4 T cells after stimulation**

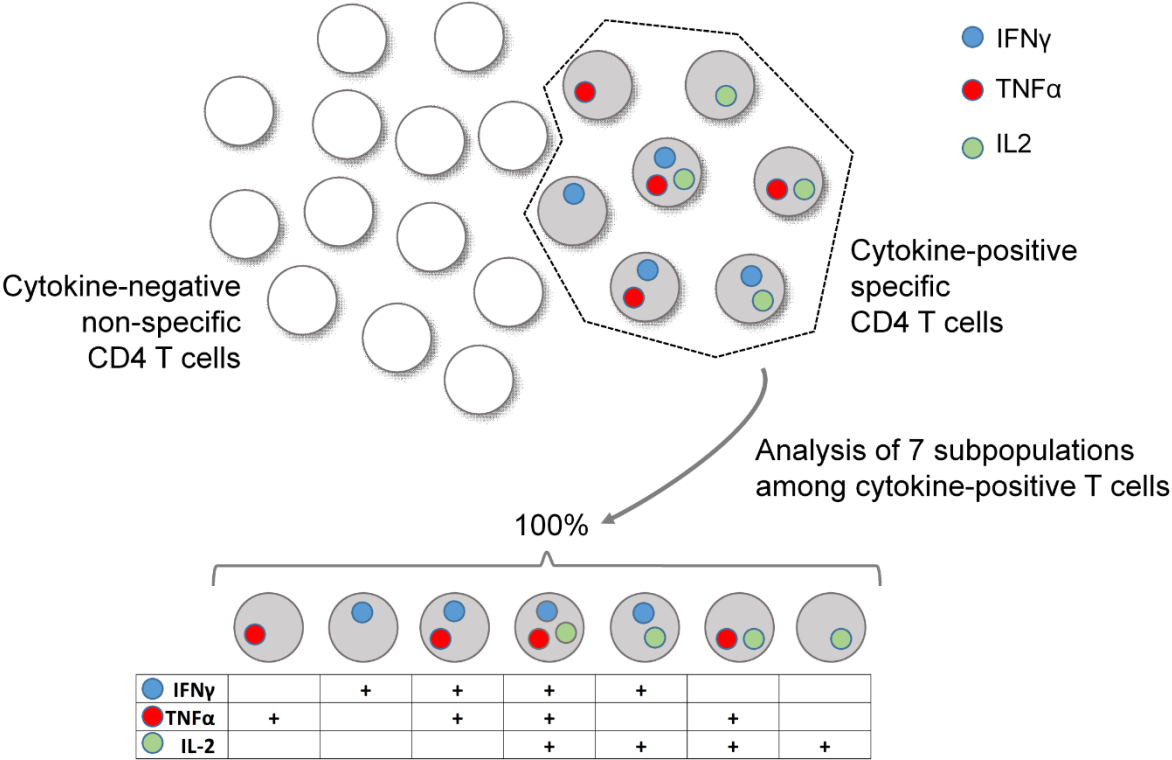

**Figure S8: Determination of cytokine expression profiles of cytokine-positive specific CD4 T cells after stimulation.** Cytokine-positive specific cells were determined and quantified among total CD4 T cells after antigen-specific stimulation (relevant for figure 2 (IFN $\gamma$ -expressing cells in blue) and supplementary figure S3 (all cytokine-positive cell populations)). These cytokine-positive specific CD4 T cells were set as 100% and distribution of the 7 different subpopulations among these cytokine-positive specific CD4 T cells were analyzed and compared between patient groups (relevant for figure 3A). The schematic illustration does not indicate CD69 positivity as an additional marker for activated cells. IFN, interferon; IL, interleukin; TNF, tumor necrosis factor.

## Supplementary Tables

**Table S1: Antibodies for co-stimulation and flow cytometric analysis**

| Antigen        | conjugate      | clone       | isotype | reactivity       |
|----------------|----------------|-------------|---------|------------------|
| CD3            | APC, PerCP     | SK7         | IgG1 k  | mouse anti-human |
| CD4            | PE-Cy7, APC-H7 | SK3         | IgG1 k  | mouse anti-human |
| CD8            | V500, PerCP    | RPA-T8, SK1 | IgG1 k  | mouse anti-human |
| CD16           | PE             | 3G8         | IgG1 k  | mouse anti-human |
| CD19           | FITC           | HIB19       | IgG1 k  | mouse anti-human |
| CD25           | V450           | M-A251      | IgG1 k  | Mouse anti-human |
| CD27           | APC            | L128        | IgG1 k  | mouse anti-human |
| CD28*          | none           | L293        | IgG1 k  | mouse anti-human |
| CD38           | PE             | HB7         | IgG1 k  | mouse anti-human |
| CD49d*         | none           | 9F10        | IgG1 k  | mouse anti-human |
| CD56           | PE             | B159        | IgG1 k  | mouse anti-human |
| CD69           | PE-Cy7         | L78         | IgG1 k  | mouse anti-human |
| CD127          | FITC           | eBioRDR5    | IgG1 k  | mouse anti-human |
| CD152 (CTLA-4) | PE, APC        | BNI3        | IgG2a k | mouse anti-human |
| CD279 (PD-1)   | APC, PE        | MIH4        | IgG1 k  | mouse anti-human |
| Granzyme B     | V450           | GB11        | IgG1 k  | mouse anti-human |
| IFN $\gamma$   | FITC           | 4S.B3       | IgG1 k  | mouse anti-human |
| IgD            | PE-Cy7         | IA6-2       | IgG2a k | mouse anti-human |
| IL-2           | PE             | MQ1-17H12   | IgG2a k | rat anti-human   |
| Ki67           | AlexaFluor 647 | B56         | IgG1 k  | mouse anti-human |
| TNF $\alpha$   | V450           | MAB11       | IgG1 k  | mouse anti-human |

All antibodies except for CD127 (eBioscience/Thermofisher) were purchased from BD.

\* co-stimulatory antibodies

**Table S2: SARS-CoV-2 peptide pools for antigen-specific stimulation**

| <b>SARS-CoV-2 antigens</b> | <b>Protein ID</b> | <b>No. of peptides</b> | <b>Peptide sequence</b>                              | <b>Protein sequence covered*</b> |
|----------------------------|-------------------|------------------------|------------------------------------------------------|----------------------------------|
| Spike glycoprotein         | P0DTC2            | 158 (N)<br>157 (C)     | 15mers with 11 aa overlap<br>+ last peptide (=17mer) | (N) 1-643 aa<br>(C) 633-1273 aa  |
| NCAP                       | P0DTC9            | 102                    | 15mers with 11 aa overlap                            | 419 aa                           |
| VEMP                       | P0DTC4            | 16                     | 15mers with 11 aa overlap                            | 75 aa                            |
| VME1                       | P0DTC5            | 53                     | 15mers with 11 aa overlap                            | 222 aa                           |

\*each pool of peptides covers the total aminoacid (aa) sequence of the corresponding protein.
