# Supplementary material for: High levels of SARS-CoV-2–specific T cells with restricted functionality in severe courses of COVID-19
Source: JCI journal article supplement (doi:10.1172/jci.insight.142167), 2020-09-16
Supplement: sd3 [file 3]

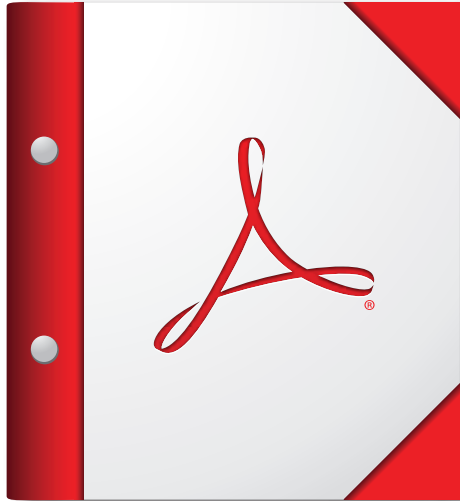

**For the best experience, open this PDF portfolio in  
Acrobat X or Adobe Reader X, or later.**

[Get Adobe Reader Now!](#)
